# Supplementary material for: Co-doped carbon materials synthesized with polymeric precursors as bifunctional electrocatalysts
Source: Royal Society of Chemistry journal article supplement (doi:10.1039/d0ra07100e), 2020-01-01
Supplement: d0ra07100e1.pdf [file d0ra07100e1.pdf]

## Co-doped carbon materials synthesized with polymeric precursors as bifunctional electrocatalyst

Imran Karajagi<sup>a, b</sup>, K. Ramya<sup>a, \*</sup>, P.C.Ghosh<sup>c</sup>, A. Sarkar<sup>d</sup>, N.Rajalakshmi<sup>a</sup>

<sup>a</sup>Centre for Fuel Cell Technology (CFCT), International Advanced Research Centre for Powder Metallurgy and New Materials (ARCI), 2<sup>nd</sup> Floor, IIT-M Research Park, Phase-1, 6, Kanagam Road, Taramani, Chennai - 600113, India.

<sup>b</sup>Centre for Research in Nanotechnology and Science (CRNTS), Indian institute of Technology Bombay, Powai, Mumbai – 400076, India.

<sup>c</sup>Department of Energy Science and Engineering, Indian institute of Technology Bombay, Powai, Mumbai – 400076, India.

<sup>d</sup>Department of Chemical Engineering, Indian institute of Technology Bombay, Powai, Mumbai – 400076, India.

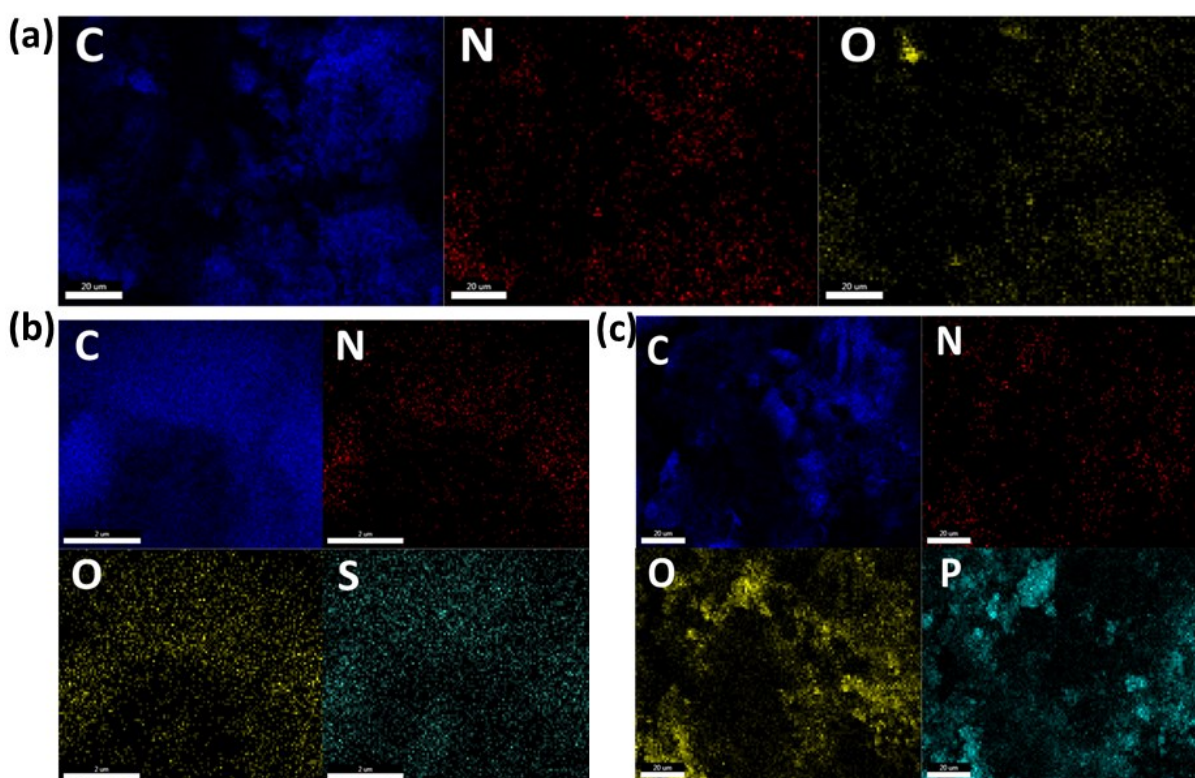

**Figure S1:** FESEM elemental mapping of C, N, O, S and P in (a) NC, (b) NSC and (c) NPC catalyst.

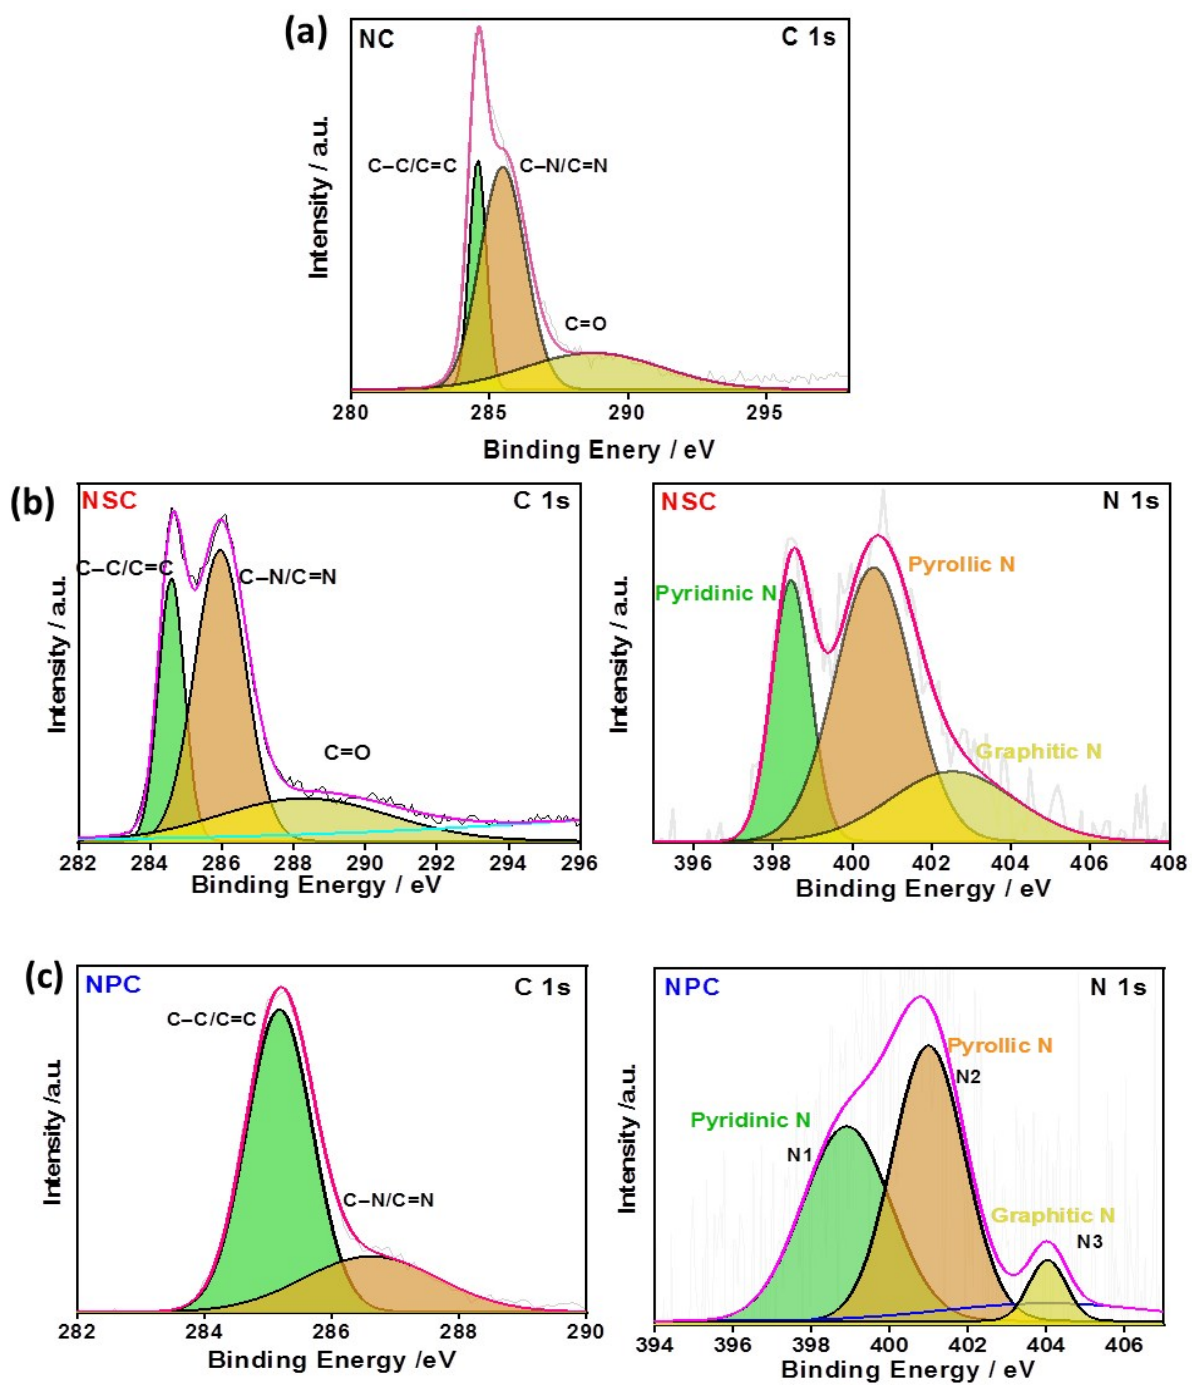

**Figure S2.** XPS (a) C 1s high resolution spectra of NC (b) C 1s and N 1s high resolution spectrum of NSC (c) C 1s and N 1s high resolution spectrum of NPC.

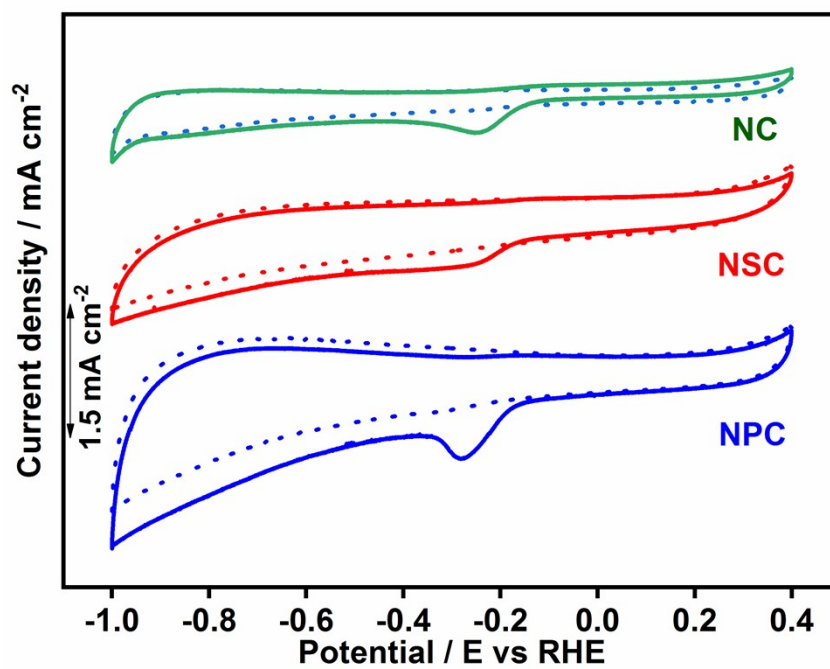

Figure S3. Cyclic voltammetry curves of NSC, NPC, NC

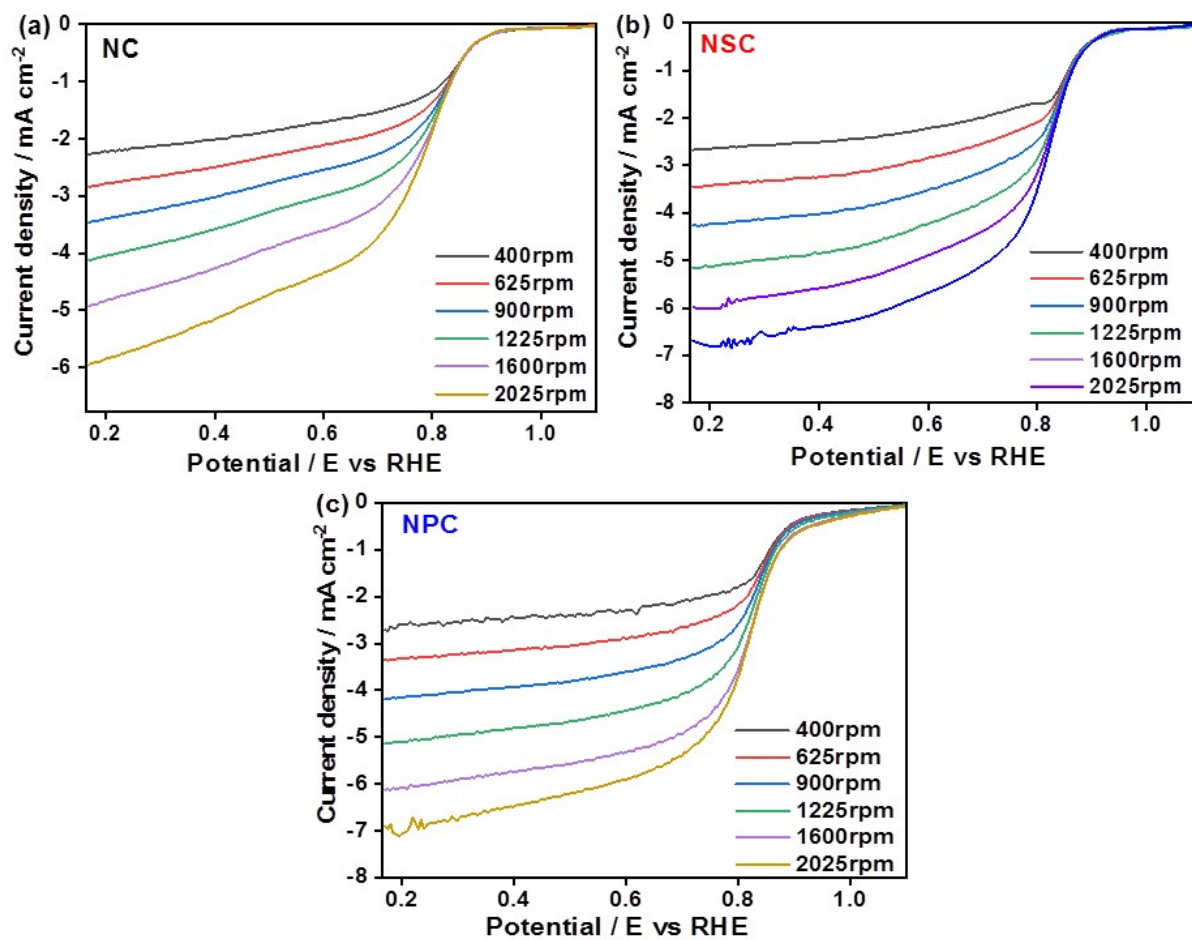

Figure S4. Cathodic linear sweep voltammetry curves of (a) NC, (b) NSC and (c) NPC at various rotations.

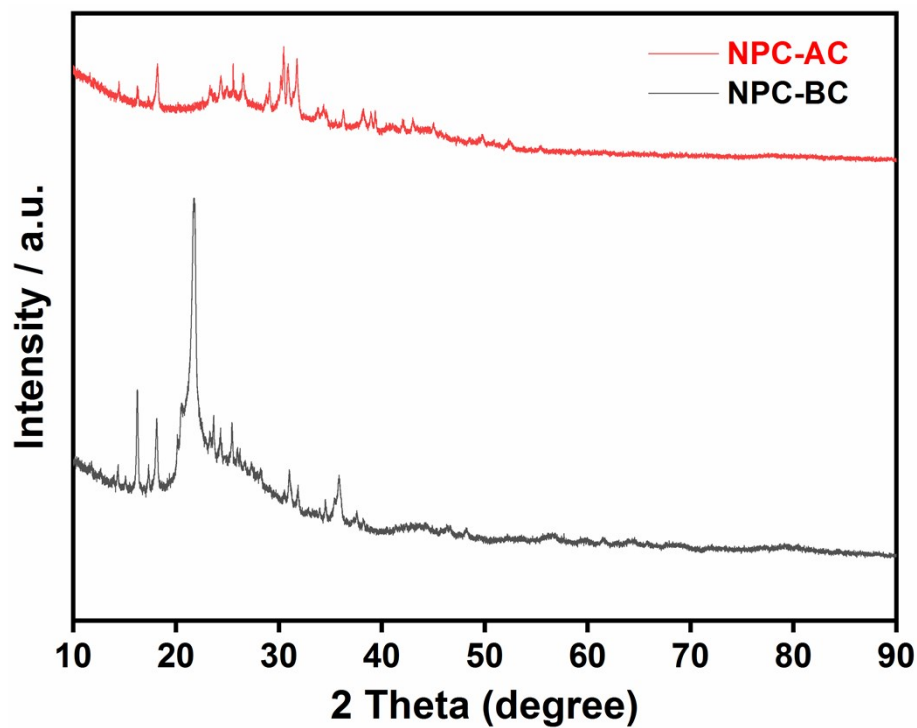

Figure S5. XRD of NPC before and after cycling.

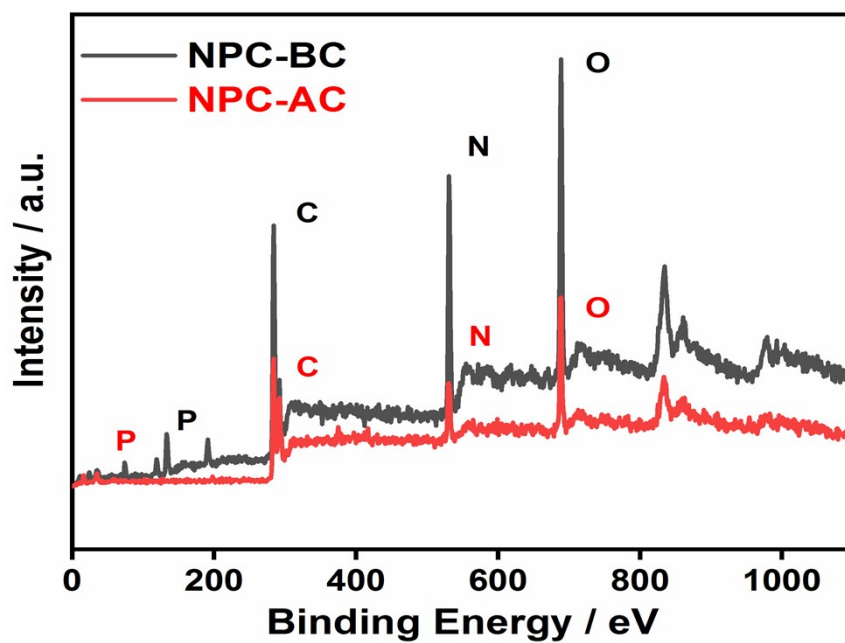

Figure S6. XPS (a) Survey spectrum of NPC before and after cycling.

**Table S1.** Various catalyst performance comparisons

| Electrocatalyst                                       | Catalyst loading (mg/cm <sup>2</sup> ) | Anode/<br>Electrolyte                                                               | Voltage gap                       | Charge-Discharge condition                          | Stability                                                              | Reference |
|-------------------------------------------------------|----------------------------------------|-------------------------------------------------------------------------------------|-----------------------------------|-----------------------------------------------------|------------------------------------------------------------------------|-----------|
| BSCF@Co-Nx-C                                          | 1 mg                                   | Zn plate<br><br>6 M KOH + 0.2 M Zn(AC) <sub>2</sub>                                 | ~0.83 V at 5 mA·cm <sup>-2</sup>  | 5 mA·cm <sup>-2</sup><br><br>600 s per cycle period | 1800 cycles; negligible voltage change at the end                      | 1         |
| FeNx-embedded PNC                                     |                                        | Zn plate<br><br>0.5 M (ZnSO <sub>4</sub> ) <sub>2</sub>                             | ~0.78 V at 5 mA·cm <sup>-2</sup>  | 5 mA·cm <sup>-2</sup> , 660 s per cycle period      | 300 cycles; negligible voltage change at the end                       | 2         |
| FeCo-NCNFs-800                                        |                                        | Zinc sheet<br><br>6 M KOH + 0.2 M Zn(AC) <sub>2</sub>                               | ~0.87 V at 10 mA cm <sup>-2</sup> | 10 mA cm <sup>-2</sup>                              | Total time period- 2500 min; polarization increased ~0.11 V at the end | 3         |
| CMT@CNT                                               | 3                                      | Zn foil,<br><br>6 M KOH + 0.2 M Zn(AC) <sub>2</sub>                                 | 1.17 V @ j=20 mA cm <sup>-2</sup> | 20 mA cm <sup>-2</sup> , 1200 s per cycle period    | 351 cycles; 117 hrs., polarization increased to 0.1 V at the end       | 4         |
| ZnCo <sub>2</sub> O <sub>4</sub> /Co <sub>x</sub> Sey | 4                                      | Zn plate,<br><br>6 M KOH + 0.2 M Zn(AC) <sub>2</sub> ·H <sub>2</sub> O              | ~0.82 V at 10 mA cm <sup>-2</sup> | 10 mA cm <sup>-2</sup> , 600 s per cycle period     | Total time period- 50 hr; negligible voltage change at the end         | 5         |
| NPC-“Li”                                              |                                        | Zinc plate<br><br>6 M KOH + 0.2 M Zn(AC) <sub>2</sub>                               | ~1.22 V at 20 mA cm <sup>-2</sup> | 20 mA cm <sup>-2</sup> , 116 s per cycle period     | 150 cycles; negligible voltage change at the end                       | 6         |
| Ni <sub>1.5</sub> Co <sub>1.5</sub> S <sub>4</sub>    | 1.5                                    | Zinc plate<br><br>6 M KOH + 0.1 M Zn(O <sub>2</sub> CCH <sub>3</sub> ) <sub>2</sub> | ~0.87 V @ j=4 mA cm <sup>-2</sup> | j=4 mA cm <sup>-2</sup> , 28 s per cycle period     | 125 cycles; polarization increased 0.04 V at the end                   | 7         |
| LaNiO <sub>3</sub> /N-CNT                             | 0.72                                   | Zn plate                                                                            | ~1.2 V @ j=20 mA                  | ~17.6 mA cm <sup>-2</sup> , 600 s per cycle         | 75 cycles; polarization                                                | 8         |

|                                                  |         |                                              |                                                                        |                                                   |                                                                   |           |
|--------------------------------------------------|---------|----------------------------------------------|------------------------------------------------------------------------|---------------------------------------------------|-------------------------------------------------------------------|-----------|
|                                                  |         | 6M KOH                                       | cm <sup>-2</sup>                                                       | period                                            | increased 0.1–0.2 V at the end                                    |           |
| Co <sub>3</sub> O <sub>4</sub> -doped Co/CoFe    | -       | 0.2 M zinc chloride + 6M KOH                 | 0.9 V @ j= 5 mA cm <sup>-2</sup>                                       | 5 mA cm <sup>-2</sup> , 1300 s per cycle period   | 180 cycles; negligible voltage change at the end                  | 9         |
| a-MnO <sub>2</sub> -LaNiO <sub>3</sub> /CNTs     |         |                                              | 0.746 V @ j=20 mA cm <sup>-2</sup>                                     | 20 mA cm <sup>-2</sup> , 600s/cycle               | 75cycles; polarization increased ~0.11V at the end                | 10        |
| CoO/N-CNT + NiFe LDH                             | 1.0/5.0 | Zn foil, 6 M KOH + 0.2 M Zn(AC) <sub>2</sub> | ~0.69 V @ j=10 mA cm <sup>-2</sup>                                     | 10 mA cm <sup>-2</sup> , 200 s per cycle period   | 60 cycles; negligible voltage change at the end                   | 11        |
| Nanostructure d NiCo <sub>2</sub> O <sub>4</sub> | -       | Zn plate 6 M KOH                             | 0.70 V @ j=20 mA cm <sup>-2</sup>                                      | ~20 mA cm <sup>-2</sup> , 300 s per cycle period  | 50 cycles; polarization increased ~0.2 V at the end               | 12        |
| LaNiO <sub>3</sub> /rGO                          | 10.1    | Zn plate 6 M KOH                             | ~0.8 V @ j=10 mA cm <sup>-2</sup> ; ~0.98 V @ j=25 mA cm <sup>-2</sup> | ~25 mA cm <sup>-2</sup> , 3600 s per cycle period | 97 cycles; negligible voltage change at the end                   | 13        |
| NiCo <sub>2</sub> S <sub>4</sub> /N-CNT          | 1.0     | Zn foil 6 M KOH + 0.2 ZnCl <sub>2</sub>      | 0.63 V @ j=10 mA cm <sup>-2</sup> ; 0.80 V @ j=20 mA cm <sup>-2</sup>  | 10 mA cm <sup>-2</sup> , 400 s per cycle period   | 150 cycles; polarization increased 0.06 V at the end              | 14        |
| NPC                                              | 4mg     | Stainless steel mesh 6 M KOH + ZnO           | 0.89 V @ j= 10 mA cm <sup>-2</sup>                                     | 10 mA cm <sup>-2</sup> , per cycle period 300 s   | 900 cycles; 100 hrs., polarization increased to 0.14 V at the end | This Work |
| NSC                                              | 4mg     | Stainless steel mesh 6 M KOH + ZnO           | 0.89 V @ j= 10 mA cm <sup>-2</sup>                                     | 10 mA cm <sup>-2</sup> , per cycle period 300 s   | 600 cycles; 80 hrs., polarization increased to 0.14 V at the end  | This Work |

## References

- [1] Y. Arafat, M. R. Azhar, Y. Zhong, X. Xu, M. O. Tadé, Z. Shao, *Nano-Micro Lett.* 2020, **12**, 130.
- [2] L. Ma, S. Chen, Z. Pei, Y. Huang, G. Liang, F. Mo, Q. Yang, J. Su, Y. Gao, J. A. Zapien and C. Zhi, *ACS Nano*. 2018, **12**, 2, 1949–1958
- [3] L. Yang, S. Feng, G. Xu, B. Wei, and L. Zhang, *ACS Sustainable Chem. Eng.* 2019, **7**, 5, 5462–5475
- [4] W. Xie, J. Li, Y. Song, S. Li, J. Li and M. Shao, *Nano-Micro Lett.* 2020, **12**, 97.
- [5] Z. Mai, W. Duan, K. Wang, Z. Tang, and S. Chen, *Sustainable Energy Fuels*. 2020, **4**, 2184-2191
- [6] P. Li, H. Jang, B. Yuan, Z. Wu, X. Liu and J. Cho, *Inorg. Chem. Front.* 2019, **6**, 417-422.
- [7] Y. Xu, A. Sumboja, Y. Zong and J. A. Darr, *Catal. Sci. Technol.* 2020, **10**, 2173-2182.
- [8] Z. Chen, A. Yu, D. Higgins, H. Li, H. Wang, and Z. Chen, *Nano Lett.* 2012, **12**, 4, 1946-1952.
- [9] L. Tongtong, L. Yongxin, Z. Shuaishuai, G. Zhi-Da, S. Yan-Yan, *J. Mater. Chem. A*. 2018, **6**, 3730-3737.
- [10] M. Hongyun, W. Baoguo, *RSC Adv.* 2014, **4**, 46084–46092.
- [11] L. Yanguang, G. Ming, L. Yongye, J. Feng, K. Ji-Eun, W. Hailiang, H. Guosong, Z. Bo, D. Hongjie, *Nat. Commun.* 2013, **4**, 1805.
- [12] M. Prabu, K. Ketpang and S. Shanmugam, *Nanoscale*. 2014, **6**, 3173-3181.
- [13] C. Sheng, D. Jingjing, B. Pengju, T. Youhong, Z. Rongkun, Q. Shi-Zhang, *Adv. Energy Mater.* 2015, **5**, 1500936.
- [14] H. Jie., L. Qiunan, S. Ziwei, L. Zhang, H. Huang, *RSC. Adv.* 2016, **6**, 86386-86394.
